# Supplementary material for: Determination of Pesticides, Mycotoxins and Glyceryl Trioleatein in Coicis Semen by GC/LC-Q-TOF/MS
Source: Research Square preprint supplement (doi:10.21203/rs.3.rs-6680514/v1), 2025-06-09
Supplement: Supplementary file 1 [file 71a98e8aeced3f0b0c369817.docx]

**Table 1** Differences in peak area of compounds in different mobile phase systems

| **No.** | **Compounds** | methanol system | acetonitrile system | methanol system**/**acetonitrile system**＞1** |
| --- | --- | --- | --- | --- |
| 1 | Aflatoxin B1 | 166480.6598 | 133133.8203 | Y |
| 2 | Aflatoxin B2 | 143207.0767 | 107710.4681 | Y |
| 3 | Aflatoxin G1 | 166272.138 | 82627.37041 | Y |
| 4 | Aflatoxin G2 | 98903.05512 | 47098.17163 | Y |
| 5 | Aldicarb | 770.3650552 | 958.6741001 | N |
| 6 | Aldicarb-sulfone | 91672.1082 | 44156.4531 | Y |
| 7 | Aldicarb-sulfoxide | 140477.5374 | 34984.62507 | Y |
| 8 | Cadusafos | 730519.519 | 301572.244 | Y |
| 9 | Carbofuran | 142964.3204 | 102714.2821 | Y |
| 10 | Carbofuran-3-Hydroxy | 64084.53271 | 53923.21038 | Y |
| 11 | Chlordimeform | 51423.65424 | 55638.89952 | N |
| 12 | Chlorsulfuron | 69100.80397 | 32979.14048 | Y |
| 13 | Demeton | 143644.4545 | 113697.3175 | Y |
| 14 | DON | 271.268956 | 27.23352257 | Y |
| 15 | Ethametsulfuron | 96042.75448 | 8469.112738 | Y |
| 16 | Ethoprophos | 87728.62166 | 38635.32073 | Y |
| 17 | Fenamiphos | 584837.0455 | 299384.3265 | Y |
| 18 | Fenamiphos-sulfone | 263411.3117 | 93378.53378 | Y |
| 19 | Fenamiphos-sulfoxide | 169365.8618 | 71663.91446 | Y |
| 20 | Fonofos | 25289.26507 | 3020.625574 | Y |
| 21 | Fumonisin B1 | 1634.99439 | 0 | Y |
| 22 | Fumonisin B2 | 4051.965469 | 0 | Y |
| 23 | Isazofos | 321108.0581 | 173943.7191 | Y |
| 24 | isocarbophos | 1713.46994 | 721.7415751 | Y |
| 25 | Isofenphos-Methyl | 462363.5143 | 297913.58 | Y |
| 26 | Methamidophos | 241345.6736 | 25302.91405 | N |
| 27 | Metsulfuron-Methyl | 233661.5724 | 160354.9162 | Y |
| 28 | Monocrotophos | 366655.8251 | 180347.8789 | Y |
| 29 | Phorate-Sulfone | 137234.8253 | 24902.10581 | Y |
| 30 | Phorate-Sulfoxide | 103872.6913 | 97560.48596 | Y |
| 31 | Phosfolan | 373476.8654 | 334520.4314 | Y |
| 32 | Phosfolan-Methyl | 262690.5993 | 238104.0399 | Y |
| 33 | Phosphamidon | 158329.8515 | 142565.1927 | Y |
| 34 | Sulfotep | 88194.18135 | 18314.88192 | Y |
| 35 | Terbufos-Sulfone | 138918.7184 | 61076.8866 | Y |
| 36 | Terbufos-Sulfoxide | 625624.6338 | 564446.621 | Y |
| 37 | zearalenone | 11631.62788 | 3197.994537 | Y |

**Table 2** Comparison of experimental operation time for different acidity extractants

| Modes | 2% formic acid | 3% formic acid | 5% formic acid | 10% formic acid |
| --- | --- | --- | --- | --- |
| Parallel concentration | 15-17 min | 14-18 min | 15 min | 21-24 min |
| Nitrogen blowing | 1.5-1.6 h | 1.5 h | 3.2 h | 3.2 h |
